# Supplementary material for: Observational constraints on the global atmospheric budget of ethanol
Source: Copernicus journal article supplement (doi:10.5194/acpd-10-925-2010), 2010-01-18

# Supplementary Material

## Observational Constraints on the Global Atmospheric Budget of Ethanol

Vaishali Naik<sup>1,2,\*</sup>, Arlene M. Fiore<sup>3</sup>, Larry W. Horowitz<sup>3</sup>, Hanwant B. Singh<sup>4</sup>, Christine Wiedinmyer<sup>5</sup>, Alex Guenther<sup>5</sup>, Joost A. de Gouw<sup>6,7</sup>, Dylan B. Millet<sup>8</sup>, Paul D. Goldan<sup>6,7</sup>, William C. Kuster<sup>6</sup>, and Allen Goldstein<sup>9</sup>

[1]{Woodrow Wilson School, Princeton University, NJ, USA}

[2]{Program in Atmospheric and Oceanic Sciences, Princeton University, NJ, USA}

[3]{Geophysical Fluid Dynamics Laboratory, NOAA, Princeton, NJ, USA}

[4]{NASA AMES, Moffett Field, CA, USA}

[5]{NCAR, Boulder, CO}

[6]{NOAA Earth System Research Laboratory, Boulder, CO, USA}

[7]{Cooperative Institute for Research in Environmental Sciences, University of Colorado, Boulder, CO, USA}

[8]{Department of Soil, Water and Climate, University of Minnesota, St. Paul, MN, USA}

[9]{University of California at Berkeley, Department of Environmental Science, Policy and Management, CA, USA}

\*Now at High Performance Technologies Inc./Geophysical Fluid Dynamics Laboratory, NOAA, Princeton, NJ, USA

Correspondence to: V. Naik (Vaishali.Naik@noaa.gov)

## 1 **Biogenic Ethanol Emissions**

2 Laboratory and field measurements suggest that ethanol is produced from fermentative processes  
3 in trees in response to a number of environmental stresses including flooding, drought, or high  
4 levels of pollutant trace gases (for example, ozone or sulfur dioxide) (Kimmerer and Kozlowski,  
5 1982; MacDonald and Kimmerer, 1987). For example, laboratory measurements show enhanced  
6 ethanol emissions from flooded trees and grasses over those from non-flooded plants (Holzinger  
7 et al., 2000). Field measurements conducted in the Sierra Nevada Mountains show that high  
8 levels of ethanol are emitted from ponderosa pine trees (Schade and Goldstein, 2001) and are  
9 found to increase after high ozone deposition fluxes (Schade and Goldstein, 2002).  
10 Measurements also show that ambient temperature and moisture strongly influence ethanol  
11 emissions from ponderosa pine trees (Schade and Goldstein, 2001, 2002). However, since field  
12 measurements are scarce, it is not clear whether all green plants emit ethanol by the same  
13 mechanism. Furthermore, lack of widespread field measurements makes it difficult to develop  
14 models to estimate ethanol emissions on a global scale.

15 Here, we simulate the biogenic ethanol emissions using an approach that combines the  
16 procedures of Guenther et al. (2000) and Guenther et al. (2006) with observations reported by  
17 Schade and Goldstein (2001,2002). Our emission estimate is meant to provide a first guess about  
18 the magnitude, spatial distribution and the potential importance of biogenic ethanol emissions on  
19 a global scale. Emissions are calculated as

$$20 \text{ Emission} = \text{EF} * \gamma_T * \gamma_{\text{LAI}},$$

21 where EF is the vegetation-specific emission factor ( $\text{mg m}^{-2} \text{ hr}^{-1}$ ) for ethanol,  $\gamma_T$  is the  
22 temperature dependence for ethanol emission, and  $\gamma_{\text{LAI}}$  is the dependence of the emissions on leaf  
23 area index. The emission factors (Fig. S1) for ethanol are primarily based on the  
24 recommendations of Guenther et al. (2000) except that emissions from coniferous trees are based  
25 on measurements at the ponderosa pine plantation in the Sierra Nevada Mountains of California  
26 (Schade and Goldstein, 2001, 2002). The minimal set of measurements results in emission  
27 factors that are highly uncertain, estimated at a factor of 3. The temperature dependence for  
28 ethanol emissions is given by  $\gamma_T = \exp[\beta * (T_{\text{air}} - 303)]$ , where,  $\beta$  is equal to 0.13 (Schade and  
29 Goldstein, 2001) and  $T_{\text{air}}$  is air temperature. The dependence of emissions on leaf area index is

1 given by  $\gamma_{LAI} = 0.49 * LAI_c / [(1+0.2* LAI_c^2)^{0.5}]$  (Guenther et al., 2006) where  $LAI_c$  is the  
 2 monthly mean leaf area index derived from MODIS satellite measurements for 2003. The  
 3 dependence of ethanol emissions on root flooding or plant stress is not considered here. With the  
 4 availability of more information, the calculation of biogenic ethanol emissions has recently been  
 5 revised to include the dependence on light and root flooding in MEGANv2.1 (Millet et al.,  
 6 2009).

## 7 **Production of Ethanol from Propanal**

9 Ethanol is produced when an ethyl peroxy radical ( $C_2H_5O_2$ ) reacts with itself or with other  
 10 organic peroxy radicals under low  $NO_x$  conditions (R1 and R2 in the main text, repeated below).  
 11 Besides ethane, propanal ( $C_2H_5CHO$ ) and peroxy propionic nitrate (PPN) provide additional  
 12 sources of ethyl peroxy radicals in the atmosphere. Ethanol can be produced from propanal by  
 13 the following sequence of reactions in the atmosphere.

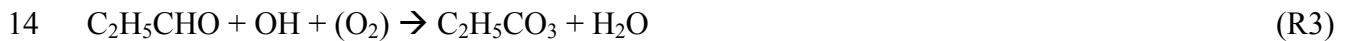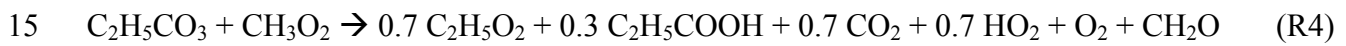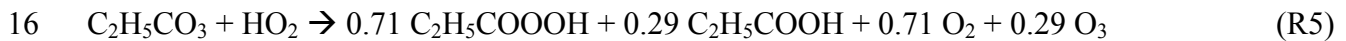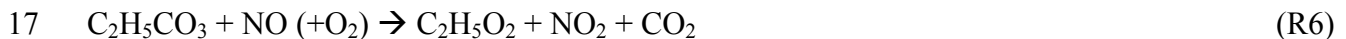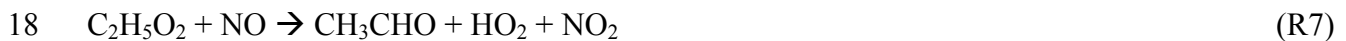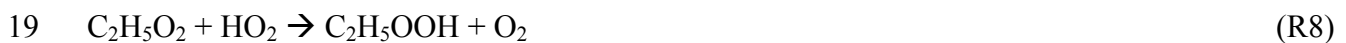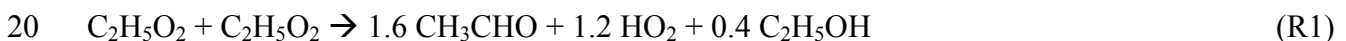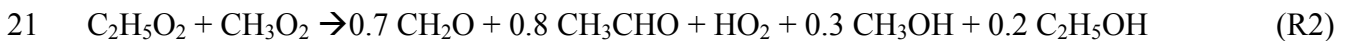

22 The ethanol production rate from the above sequence of chemical reactions is given by  
 23  $P(C_2H_5OH) = 0.2 * k_2 [C_2H_5O_2][CH_3O_2]$ . The  $C_2H_5OH$  production from the self-reaction is two  
 24 orders of magnitude smaller and therefore negligible. Since  $C_2H_5O_2$  and  $C_2H_5CO_3$  are short-lived  
 25 radicals, we assume their concentrations to be at steady state. The ethanol production rate is then  
 26 given by  $P(C_2H_5OH) = 0.2 \times k_3 \times f \times [C_2H_5CHO][OH]$ , where

$$27 \quad f = \frac{k_2 [CH_3O_2]}{k_4 [CH_3O_2] + k_5 [HO_2] + k_6 [NO]} \times \frac{0.7k_4 [CH_3O_2] + k_6 [NO]}{k_2 [CH_3O_2] + k_7 [NO] + k_8 [HO_2]}$$

1  
2 We obtain the values of rate constants  $k_3$ ,  $k_4$ ,  $k_5$ , and  $k_6$  from the Master Chemical Mechanism  
3 (<http://mcm.leeds.ac.uk/MCM>), and  $k_2$ ,  $k_7$ , and  $k_8$  from Sander et al. (2006). Applying the rate  
4 constants at 298 K for average atmospheric conditions with  $[\text{CH}_3\text{O}_2] = [\text{HO}_2] = 1 \times 10^8$   
5 molecules  $\text{cm}^{-3}$  and  $[\text{NO}] = 2.5 \times 10^8$  molecules  $\text{cm}^{-3}$  to estimate a value of  $f = 0.005$ . Applying a  
6 mean OH concentration (Spivakovsky et al., 2000) of  $1.0 \times 10^6$  molecules  $\text{cm}^{-3}$ , mean  
7 background tropospheric  $\text{C}_2\text{H}_5\text{CHO}$  concentration of  $9.8 \times 10^8$  molecules  $\text{cm}^{-3}$  (measured off the  
8 coast of Asia), and  $k_3 = 1.9 \times 10^{-11}$  at 298 K, yields an estimated ethanol source of up to 0.1 pptv  
9  $\text{day}^{-1}$  equivalent to a global source of approximately  $0.3 \text{ Tg yr}^{-1}$ .

10 Additionally, propanal can photolyze and react with  $\text{NO}_3$  to provide another source of ethyl  
11 peroxy radical which can then produce ethanol via R2.

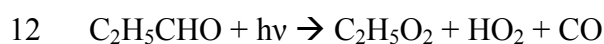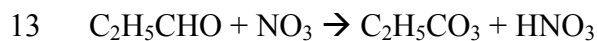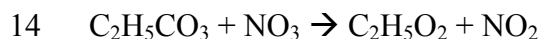

15 Including these reactions in the above mechanism adds up to  $0.1 \text{ pptv day}^{-1}$  to the ethanol source  
16 from propanal.

17 We note, however, that our calculation depends on the observed value of propanal, which is  
18 difficult to measure accurately at low free tropospheric concentrations.

19  
20 **References**

21 Guenther, A., Geron, C., Pierce, T., Lamb, B., Harley, P., and Fall, R.: Natural emissions of non-  
22 methane volatile organic compounds, carbon monoxide, and oxides of nitrogen from North  
23 America, *Atmos. Environ.*, 34, 2205-2230, 2000.

24 Guenther, A., Karl, T., Harley, P., Wiedinmyer, C., Palmer, P. I., and Geron, C.: Estimates of  
25 global terrestrial isoprene emissions using MEGAN (Model of Emissions of Gases and Aerosols  
26 from Nature), *Atmos. Chem. Phys.*, 6, 3181-3210, 2006.

27 Holzinger, R., Sandoval-Soto, L., Rottenberger, S., Crutzen, P. J., and Kesselmeier, J.: Emissions  
28 of volatile organic compounds from *Quercus ilex* L. measured by Proton transfer reaction mass

1 spectroscopy under different environmental conditions, *J. Geophys. Res.*, 105, 20573-20579,  
2 2000.

3 Kimmerer, T. W. and Kozlowski, T. T.: Ethylene, ethane, acetaldehyde, and ethanol production  
4 by plants under stress, *Plant Physiol.*, 69, 840-847, 1982.

5 MacDonald, R. C. and Kimmerer, T. W.: Ethanol in the stems of trees, *Physiol. Plant.*, 82, 582-  
6 588, 1987.

7 Millet, D. D., Guenther, A., Siegel, D. A., Nelson, N. B., Singh, H. B., de Gouw, J. A., Warneke,  
8 C., Williams, J., Eerdeken, G., Sinha, V., Karl, T., Flocke, F., Apel, E., Riemer, D., Palmer, P.  
9 I., and Barkley, M.: Global atmospheric budget of acetaldehyde: 3D model analysis and  
10 constraints from in-situ and satellite observations, *Atmos. Chem. Phys.*, submitted, 2009.

11 Sander, S. P., et al.: Chemical Kinetics and Photochemical Data for Use in Atmospheric Studies,  
12 Evaluation Number 15, JPL Publication 06-2, Jet Propulsion Laboratory, Pasadena, 2006.

13 Schade, G. and Goldstein, A. H.: Fluxes of oxygenated volatile organic compounds from a  
14 ponderosa pine plantation, *J. Geophys. Res.*, 106, 3111-3123, 2001.

15 Schade, G. and Goldstein, A. H.: Plant physiological influences on the fluxes of oxygenated  
16 volatile organic compounds from ponderosa pine trees, *J. Geophys. Res.*, 107,  
17 doi:10.1029/2001JD000532, 2002.

18 Spivakovsky, C., Logan, J. A., et al.: Three-dimensional climatological distribution of  
19 tropospheric OH: update and evaluation, *J. Geophys. Res.*, 105, 8931-8980, 2000.

20

1 Figure S1. Global biogenic emission factors for ethanol at 1° latitude x 1° longitude resolution in  
2 units of  $\mu\text{g m}^{-2} \text{h}^{-1}$ .

3

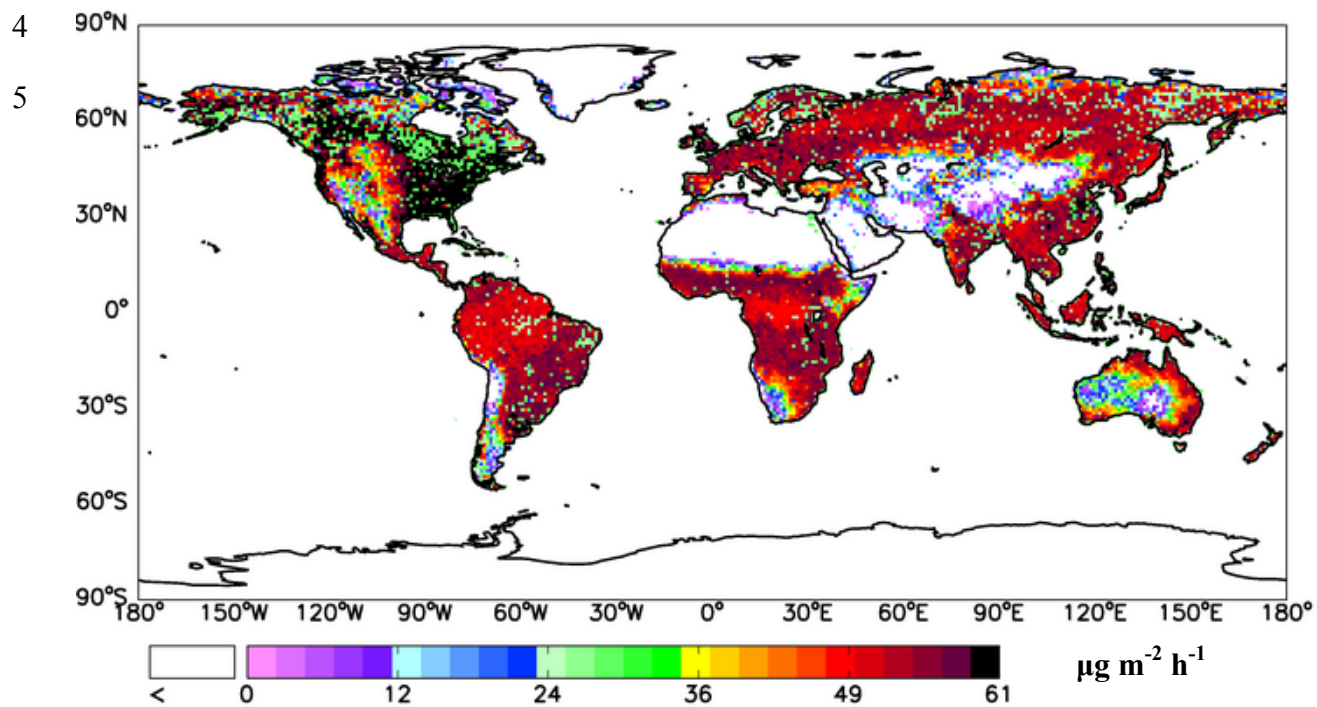

Supplement: Supplementary file 1 [file acpd-10-925-2010-supplement.pdf]
